# Supplementary material for: Efficient treatment of a preclinical inflammatory bowel disease model with engineered bacteria
Source: PubMed Central journal article supplement — Mol Ther Methods Clin Dev. 2020 Nov 20;20:218–26. doi: 10.1016/j.omtm.2020.11.010 (PMC7782194; doi:10.1016/j.omtm.2020.11.010), 2020-11-20
Supplement: mmc1.pdf [file mmc1.pdf]

## **Supplemental Information**

### **Efficient treatment of a preclinical inflammatory bowel disease model with engineered bacteria**

**Szilamer Ferenczi, Norbert Solymosi, István Horváth, Natália Szeócs, Zsuzsanna Grózer, Dániel Kuti, Balázs Juhász, Zsuzsanna Winkler, Tibor Pankotai, Farkas Sükösd, Anikó Stágel, Melinda Paholcsek, Dávid Dóra, Nándor Nagy, Krisztina J. Kovács, Ivan Zanoni, and Zoltan Szallasi**

Figure S 1 2-5 x 10<sup>8</sup> CFU / day bacteria by oral gavage

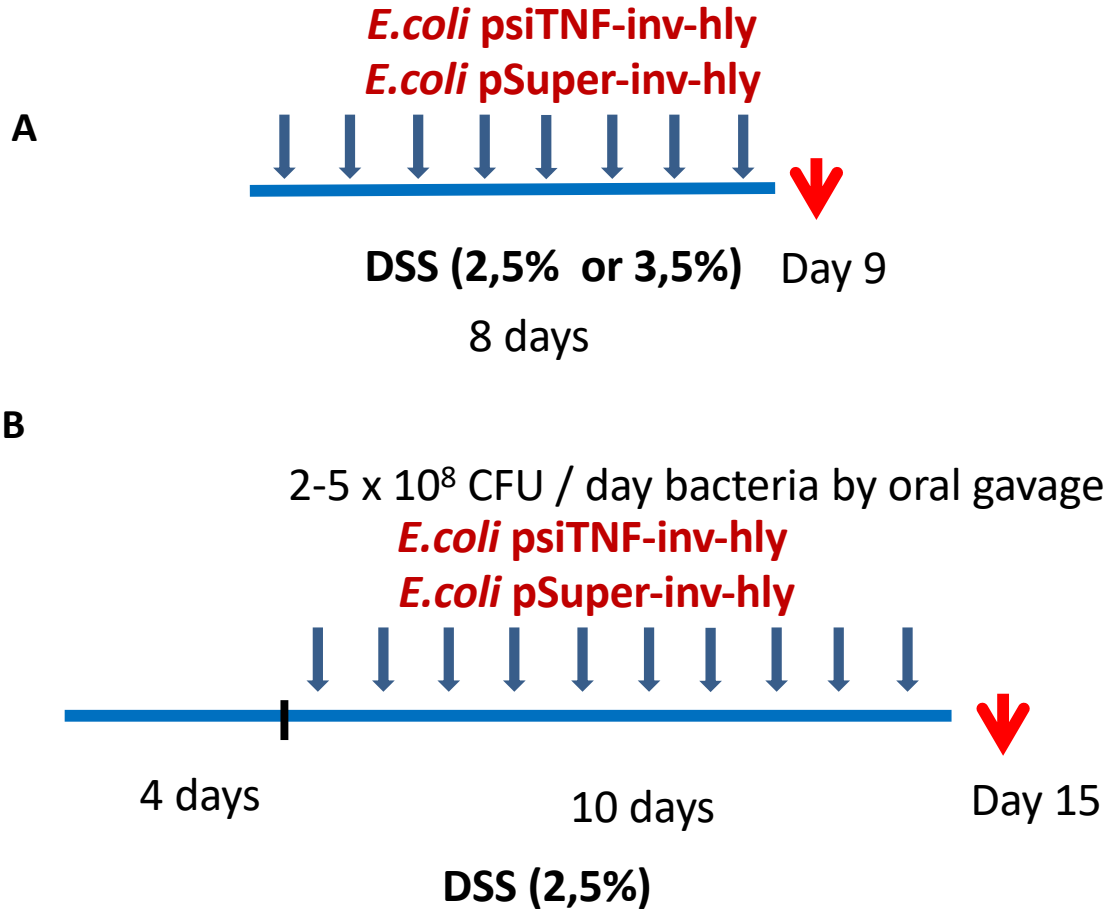

Figure S 1: Treatment protocols. Experimental animals were treated according to two types of treatment protocols. A) Animals were treated with 2.5% or 3.5% DSS added to the drinking water for eight days. The engineered bacterial cells (2-5x 10<sup>8</sup> CFU) and vehicle (sterile tap water) was administered daily by oral gavages. At the end of the experiment (day 9) animals were anesthetized and sacrificed. B) Animals were treated with 2.5% DSS added to the drinking water for four days. Animals continued to be treated with 2.5% DSS added to the drinking water for ten more days but during this period they also received engineered bacterial cells (2-5x 10<sup>8</sup> CFU) and vehicle (sterile tap water) daily by oral gavages. At the end of the experiment (day 15) animals were anesthetized and sacrificed.

Figure S 2

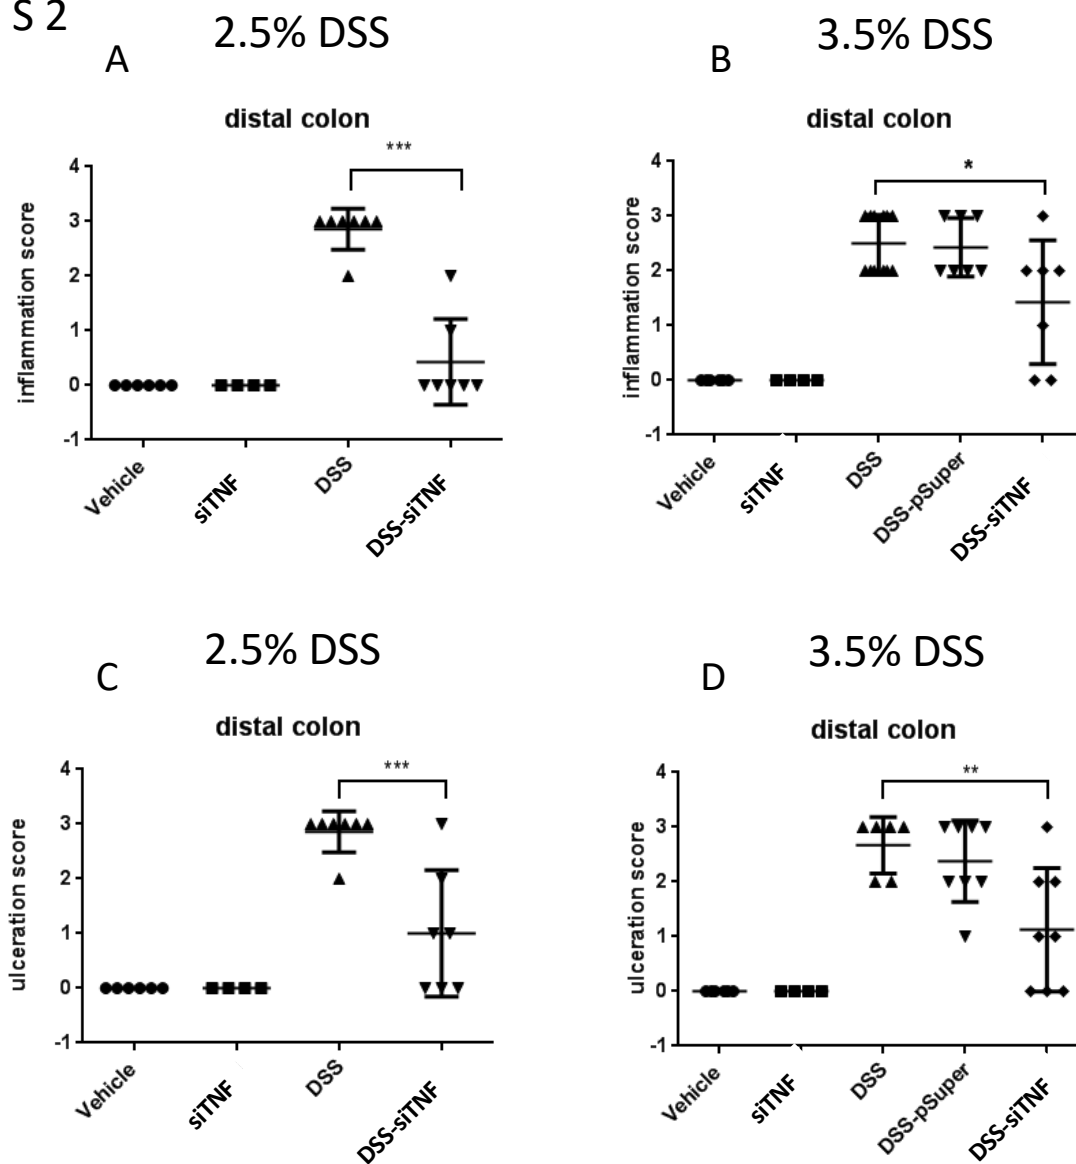

Figure S 2: The inflammation score and ulceration scores of the 2,5% and 3,5% DSS administered animals after 8 days of treatment. Histological analysis was carried out on FFPE colon samples from experimental groups and the levels of inflammation and ulceration was scored as described in the methods. A: inflammation score of the distal colon for the various treatment groups with 2,5% DSS. B: inflammation score of the distal colon for the various treatment groups with 3,5% DSS. C: ulceration scores of the distal colon for the various treatment groups with 2,5% DSS., D: ulceration scores of the distal colon for the various treatment groups with 3,5% DSS. Vehicle: Tap water administered animal group, siTNF: animals treated by modified *E. coli* MDS42 strains containing psiTNF and invasive plasmids, DSS: colon specimen of the DSS treated animals, DSS-siTNF: animals administered DSS and treated modified *E. coli* MDS42 strains containing psiTnfa and invasive plasmids, DSS-pSuper: animals administered DSS and treated by modified *E. coli* MDS42 strains containing pSuper (empty vector) and invasive plasmids. Data represent the mean (SD). \* $P < 0.05$ , \*\*  $P < 0.01$ , \*\*\*  $P < 0.001$

Figure S 3

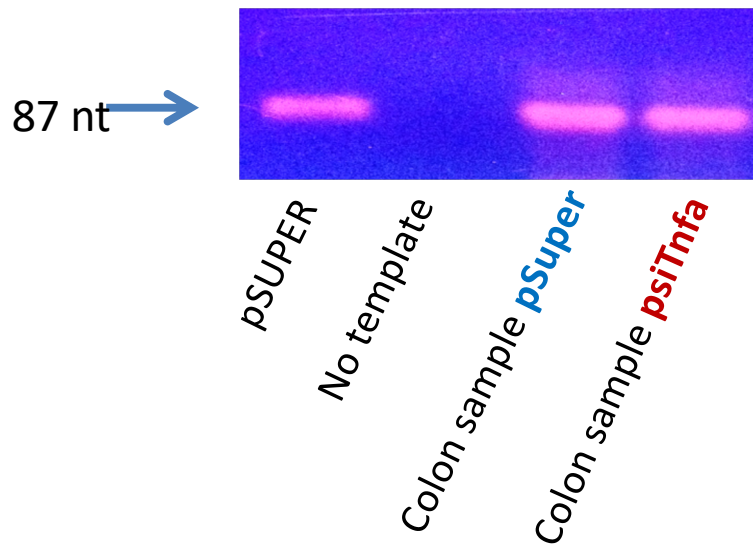

Figure S 3: Total RNA was isolated and cDNA synthesis was performed from the distal colon samples. The *gfp* expression in the colon tissue was demonstrated by PCR using *gfp* specific oligonucleotid primers. The PCR product was separated and stained on 2% agarose gel. pSUPER: intact pSUPER plasmid served as PCR template, colon sample pSUPER: cDNA from animals administered 2,5% DSS and treated by modified *E. coli* MDS42 strains containing pSuper (empty vector) and invasive plasmids served as PCR template, colon sample psiTNF: cDNA from animals administered 2,5% DSS and treated by modified *E. coli* MDS42 strains containing psiTNF silencer and invasive plasmids served as PCR template

Figure S 4

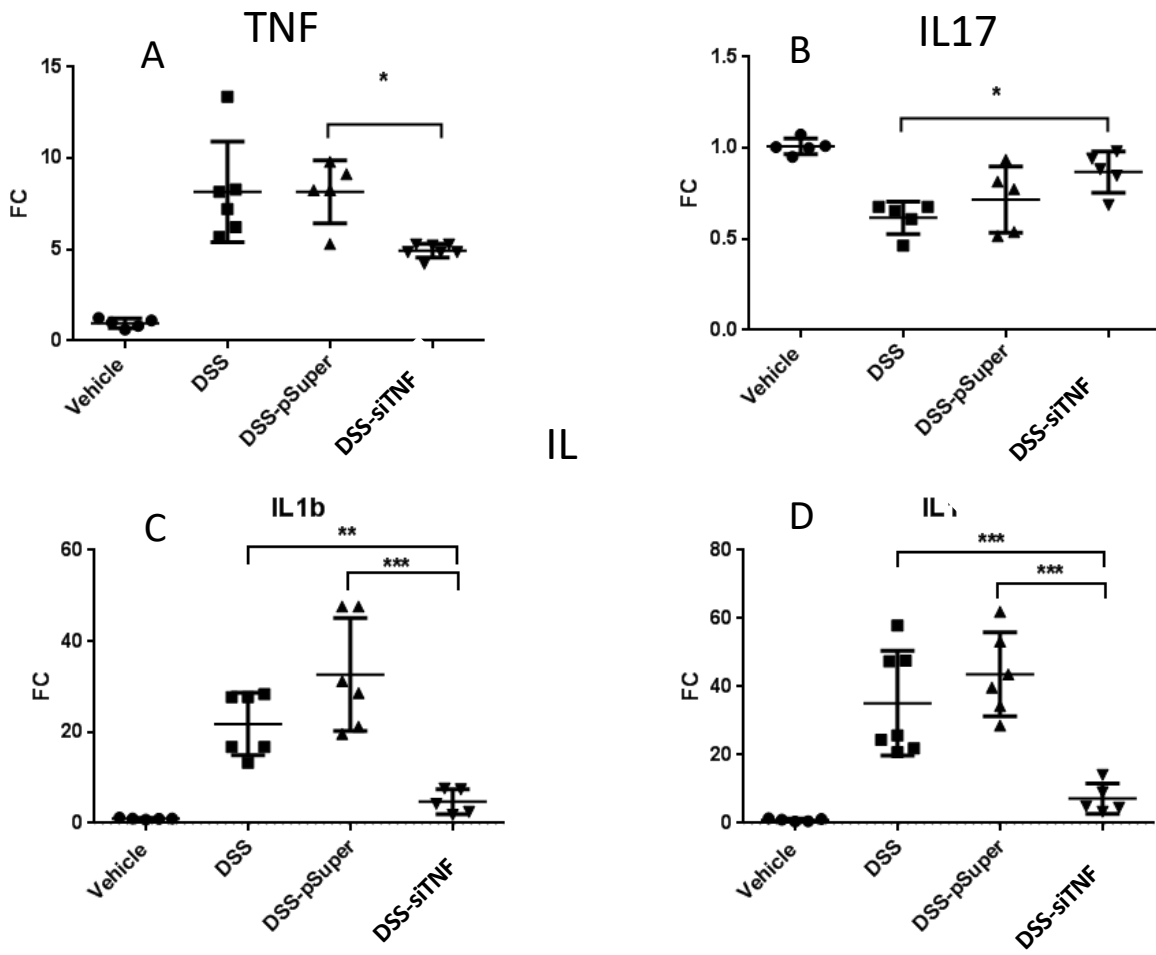

Figure S 4

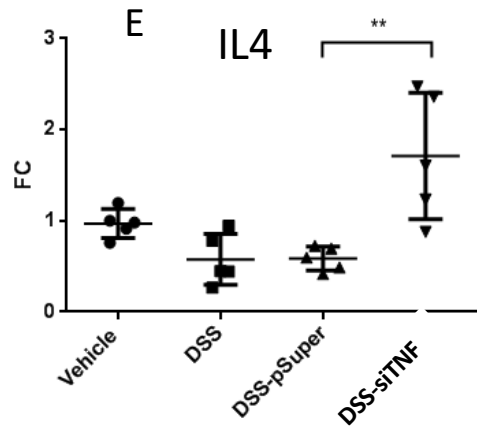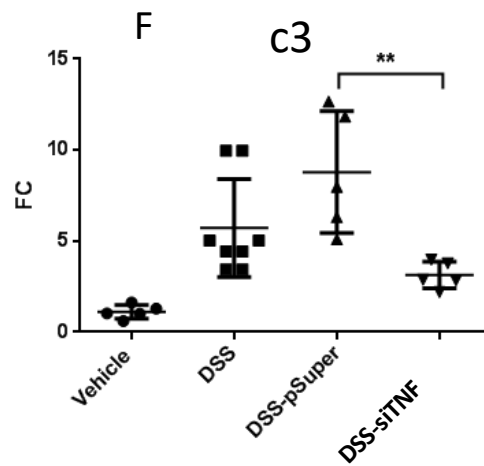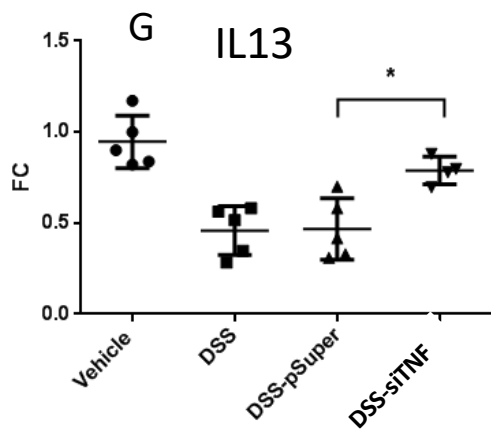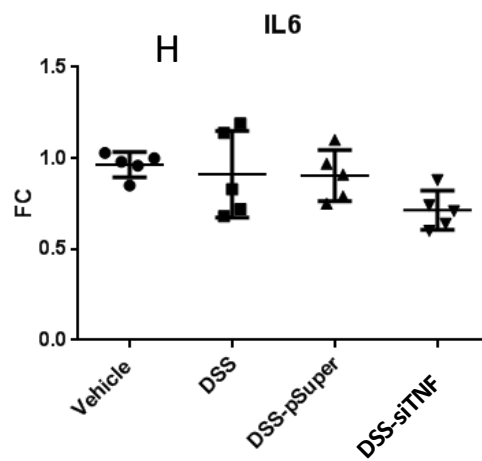

Figure S 4: mRNA expression of cytokines on 4+10 days 2,5% DSS induced colitis. Colitis and the modified *E. coli* MDS42 strains containing psiTNF and Invasive plasmid treatment induced cytokines mRNA level changes were measured by qPCR. A: TNF mRNA expression measured on distal colon samples, B: Il-17 mRNA expression measured on distal colon samples, C: Il-1b mRNA expression measured on distal colon samples, D: Il-1a mRNA expression measured on distal colon samples, E: Il-4 mRNA expression measured on distal colon samples, F: C3 complement mRNA expression measured on distal colon samples, G: IL13 mRNA expression measured on distal colon samples, H: IL6 mRNA expression measured on distal colon samples. Vehicle: Tap water administered animal group, DSS: colon specimen of the 2,5% DSS treated animals, DSS-siTNF: animals administered 2,5% DSS and treated by modified *E. coli* MDS42 strains containing psiTNF and invasive plasmids, DSS-pSuper: animals administered DSS and treated by modified *E. cc*

Figure S 5

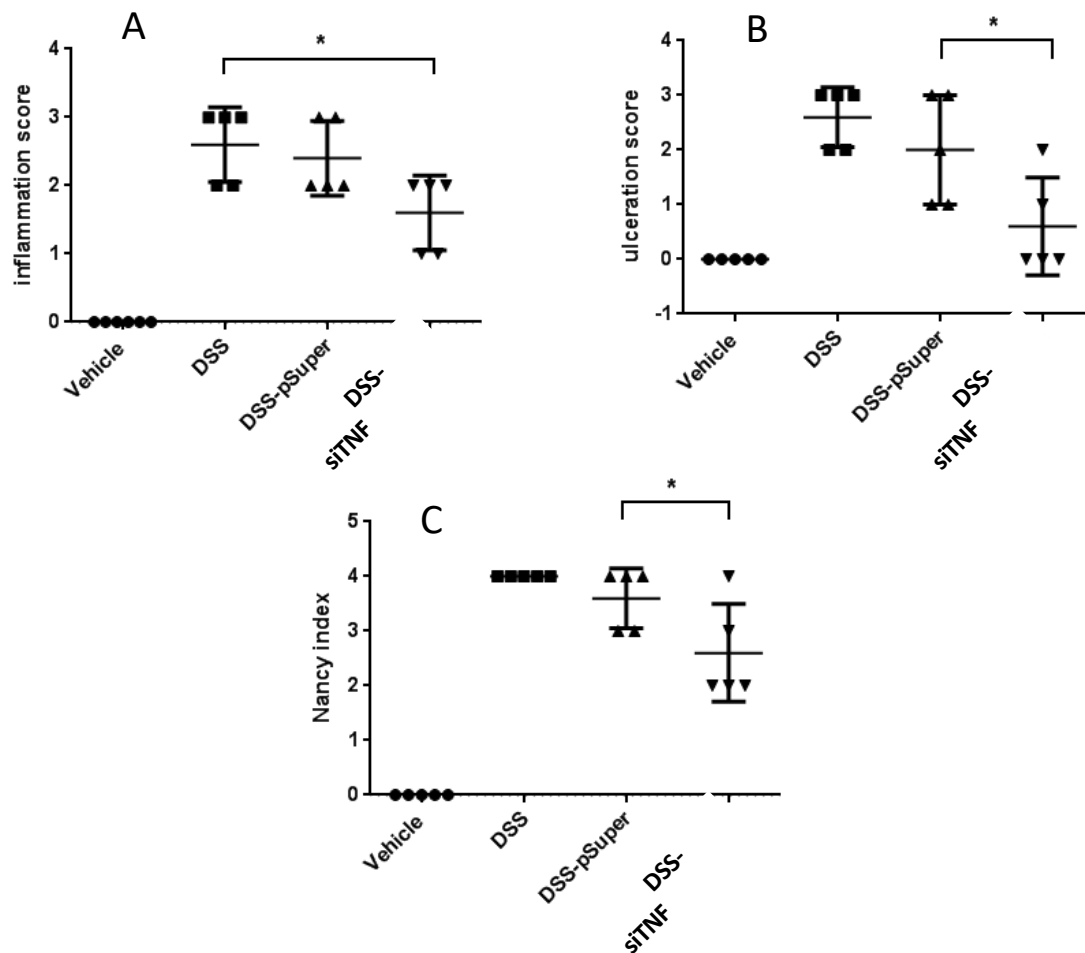

Figure S 5: The colon specimens inflammation score, ulceration score and Nancy histological index on 4+10 days 2,5% DSS induced colitis and treating them with the modified *E. coli* MDS42 strains containing psiTNF and invasive plasmid treatment. A: inflammation score of the distal colon for the various treatment groups with 2,5 % DSS, B: ulceration scores of the distal colon for the various treatment groups with 2,5 % DSS, C: Nancy histological index of the distal colon for the various treatment groups with 2,5% DSS. Vehicle: Tap water administered animal group, DSS: colon specimen of the DSS treated animals, DSS-siTNF: animals administered DSS and treated by modified *E. coli* MDS42 strains containing psiTNF and invasive plasmids. DSS-pSuper: animals administered 2,5 % DSS and treated with modified *E. coli* MDS42 strains containing pSuper (empty vector) and invasive plasmids. Data represent the mean (SD).\*  $P < 0.05$ .



**SM Table 1.: Primer sequences used in QRT-PCR reactions.**

|        |                                                            |
|--------|------------------------------------------------------------|
| GAPDH: | f: TGACGTGCCGCCTGGAGAAA, r: AGTGTAGCCCAAGATGCCCTTCAG       |
| IL-13  | f:ACAGCTCCCTGGTTCTCTCA, r: ACAGGGGAGTCTGGTCTTGT            |
| TNF    | f: CAGCCGATGGGTTGTACCTT, r: GGCAGCCTTGTGCCTTGA             |
| IL-1b  | f: GCCTCGTGCTGTTCGGACCCA , r: TGAGGCCCAAGGCCACAGGT         |
| IL-1a  | f: CCATAACCCATGATCTGGAAGAG, r: GCTTCATCAGTTTGTATCTCAAATCAC |
| IL-6   | f: CTCTGCAAGAGACTTCCATCC, r: AGTCTCCTCTCCGGACTTGT          |
| C3     | f: CCCTCACGCGCGTAGTGATT, r: TCGGCGTTGGAAGGCCGTAC           |
| IL-4   | f: AGCAACGAAGAACACCACAGA, r: AGCACCTTGGAAGCCCTA            |
| IL-17  | f: CCTGGCGGCTACAGTGAAG, r: GGAAGTCCTTGGCCTCAGTGT           |
